# Supplementary material
Source: MDPI journal article supplement (https://www.mdpi.com/2673-4931/4/1/25)
Supplement: s1 [file s1]

## Objectives & Motivation

- ❖ Performing ground-based Ice-Nucleating Particle (INP) measurement using PINE at WTAMU, Canyon, TX ('TxTEST', Jul-Aug, 2019) and the ARM-SGP, Lamont, OK ('ExINP-SGP', Oct-Nov, 2019) site, where we repeatedly observe ice crystals & clouds below 20 km AGL<sup>[1]</sup>, connecting the aerosols at ground level to higher altitudes (Fig. 1).
- ❖ Remotely controlling PINE via network for a semi-autonomous INP measurement on a 24/7 basis, filling a current deficit in ambient online INP measurements ( $n_{INP}$ )<sup>[4]</sup>.
- ❖ Complementing PINE data with offline  $n_{INPs}$  from the aerosol particles collected using the polycarbonate filters & liquid impinger suspensions.
- ❖ Examining if immersion is a more predominant ice nucleation mechanism at the SGP site.
- ❖ Developing a variety of INP parameterizations representing the U.S. intra-continental dust from various sources (e.g. agricultural soil dust, biomass burning etc).

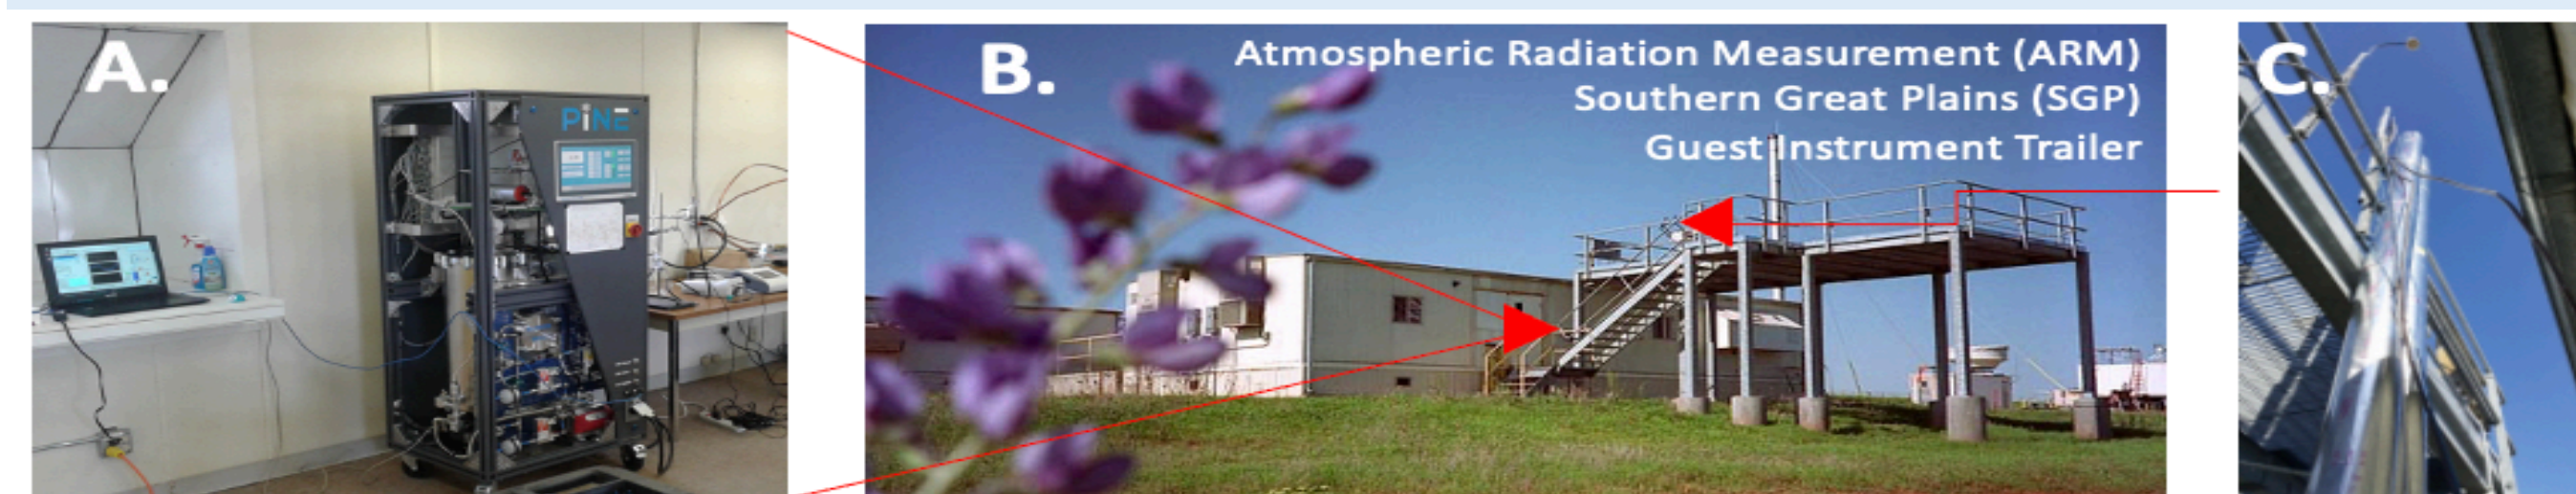

Figure 1. PINE (A) deployed at the SGP site, (B) Guest Instrument Trailer (C). A semi-laminar flow stack inlet (17.5' AGL), built by Daniel Knopf, was used to intake aerosols to PINE. Photo B - courtesy of Michael Ritsche.

## Methods

- ❖ In both campaigns, PINE made semi-autonomous INP measurements at a high time resolution of 8 minutes for individual adiabatic expansions with continuous temperature scans from -5 to -35°C in 90 minutes<sup>[7]</sup>. PINE Level-1 & Level-2 data represents  $n_{INP}$  at the end of each run & for every 0.5°C T-bins for each run at a high time resolution.
- ❖ Furthermore, a 47mm polycarbonate filter sampler was used to collect aerosol particles next to PINE. At SGP site, the filter samplings were carried out for an average period of ~2 days.
- ❖ A liquid impinger sampler was also used to collect aerosol particles at SGP site. An initial liquid (HPLC grade) volume of 20mL was used for sampling over an average period of ~2 hours.
- ❖ A semi-laminar stack inlet was used to intake aerosols to all our instruments at SGP site (Fig. 1c).
- ❖ Offline-droplet freezing assays were later conducted for aerosol particles collected on the filter and impinger samples for immersion freezing mode using WT-CRAFT<sup>[3]</sup> and INSEKT<sup>[9-10]</sup>

## Results - SGP Field Campaigns

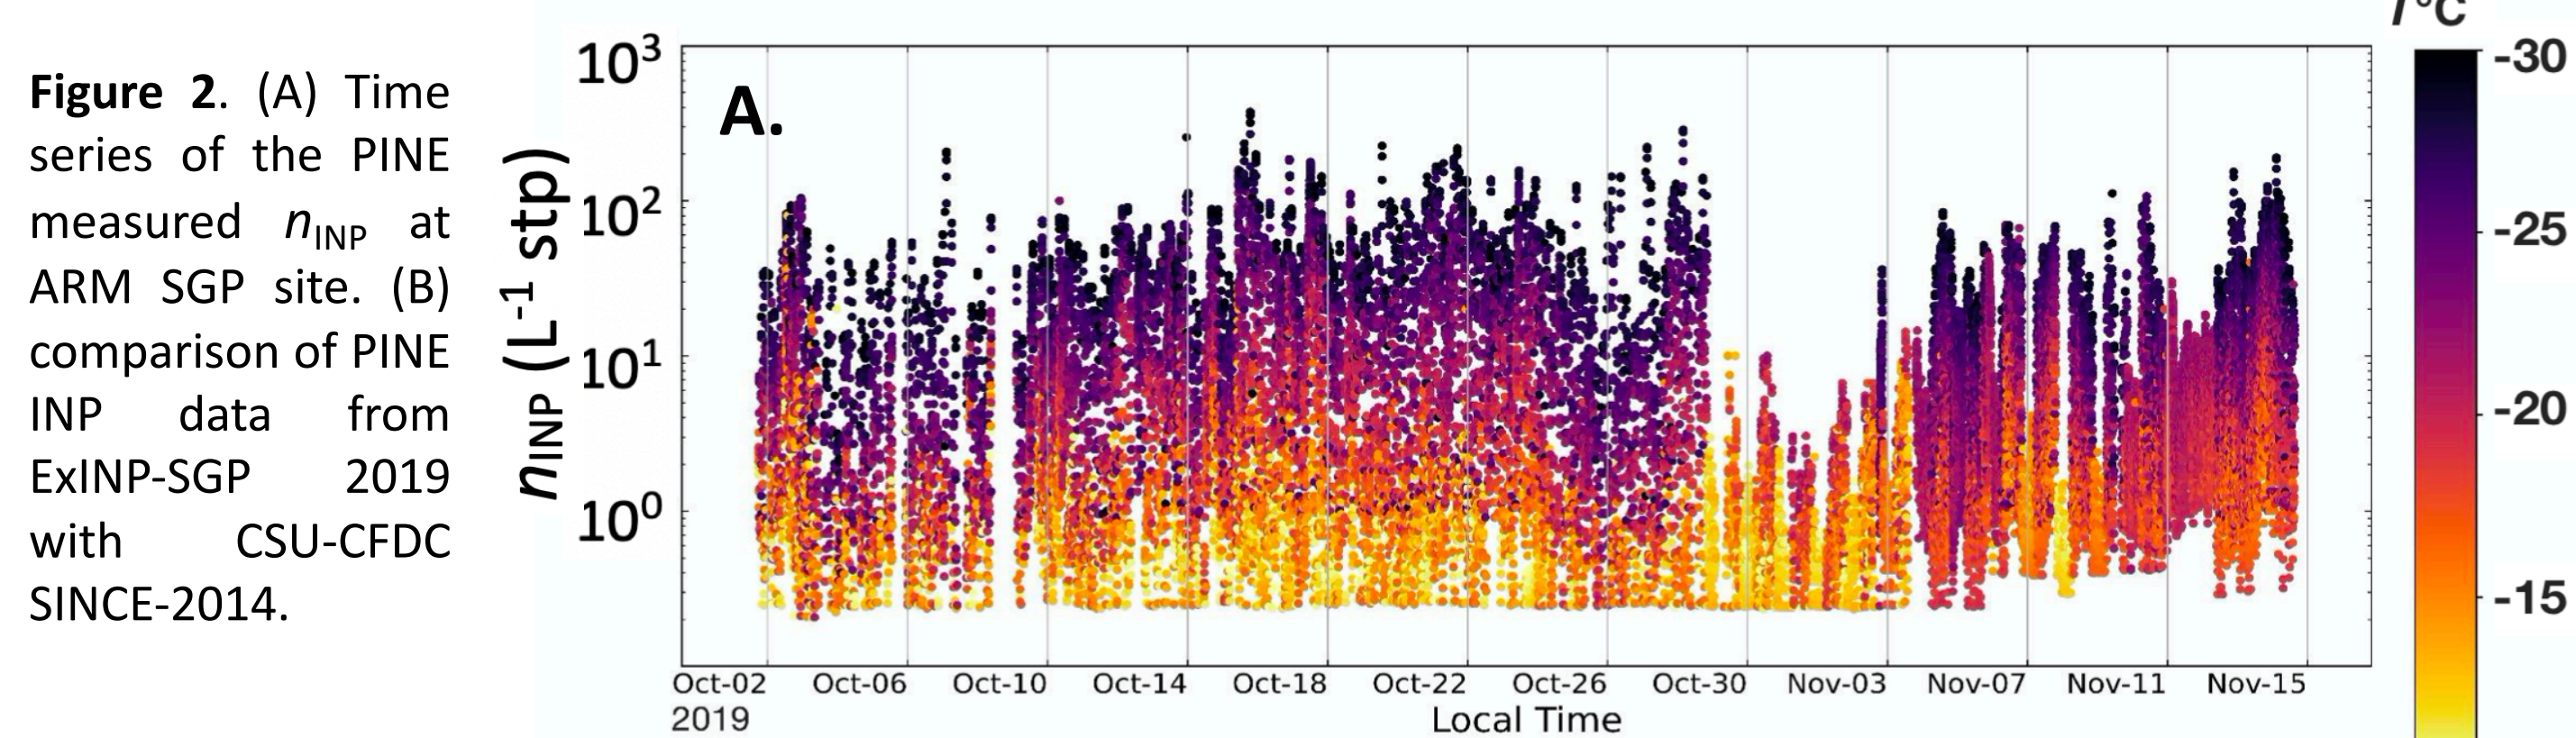

- ❖ We have successfully completed our INP measurements for 45 consecutive days with a turnover time of ~8 min scanning from -5 to -35°C. Overall, the ExINP campaign produced more than 30,000 meaningful PINE-measured INP data points (Fig. 2a).
- ❖ We observed a reasonable agreement of our PINE INP measurements with previous SINCE-2014<sup>[2]</sup> campaign at SGP site for  $T_s \leq -20^\circ\text{C}$  (Fig. 2b).

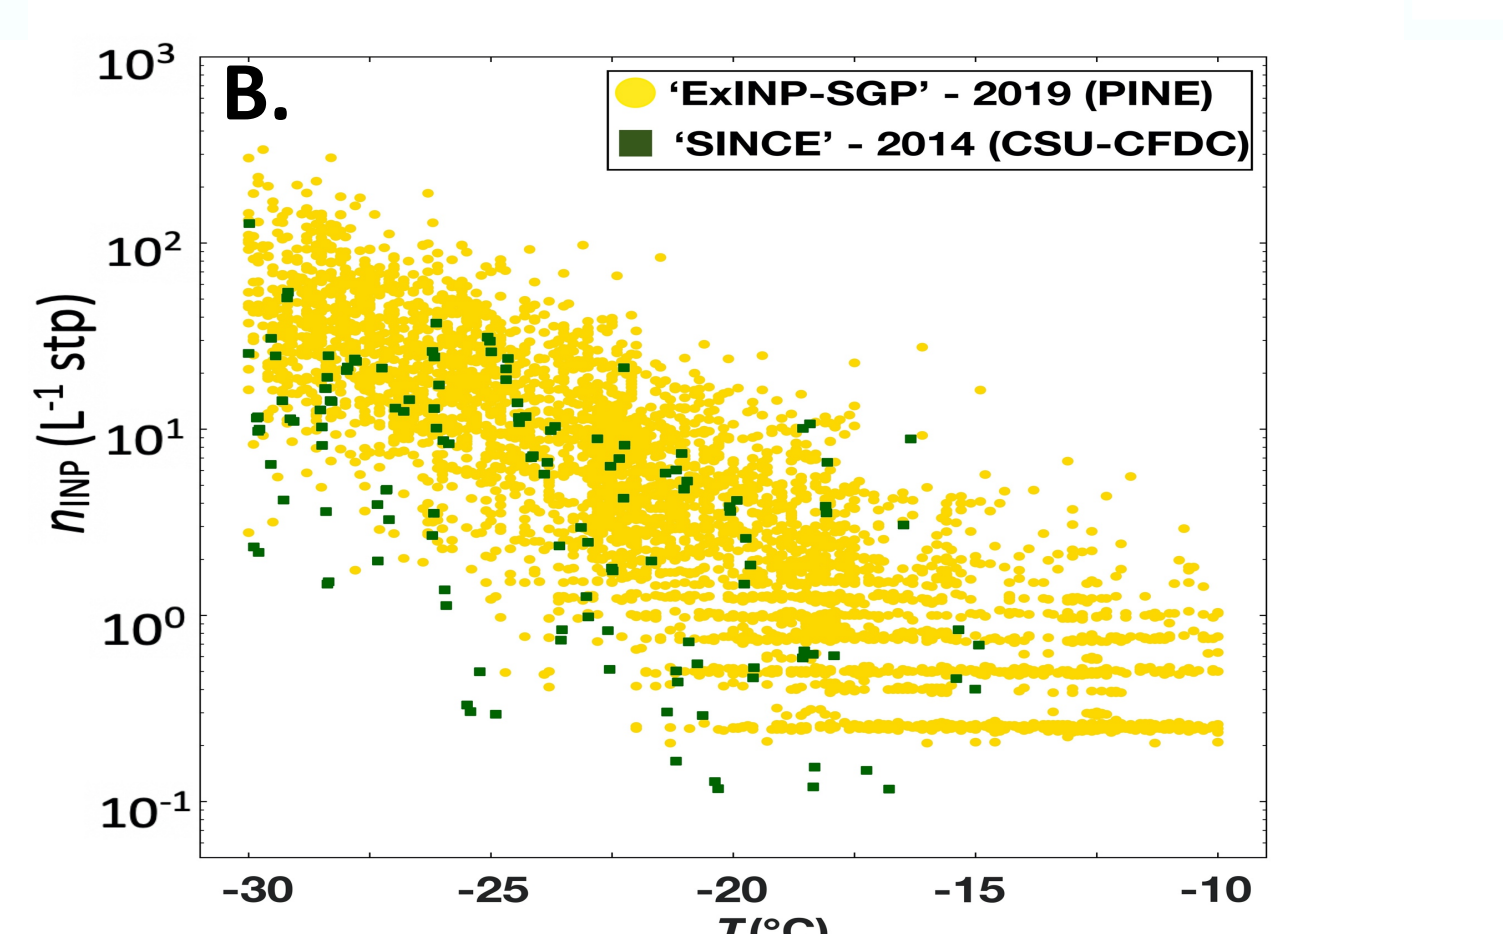

## Online vs. Offline INP Measurements

- ❖ Reasonable agreement between PINE and other offline measured INPs was found for most of the sampling days. But, a substantial deviation was observed at higher  $T_s$  (i.e.,  $\geq -15^\circ\text{C}$ ) (Fig. 3).
- ❖ Collection efficiency, transmission losses, & meteorological conditions may explain the observed deviation among PINE and offline measured INPs.

Figure 3. Comparison of PINE & offline  $n_{INP}$  for (A) 'TxTEST' and (B) 'ExINP-SGP' campaign.

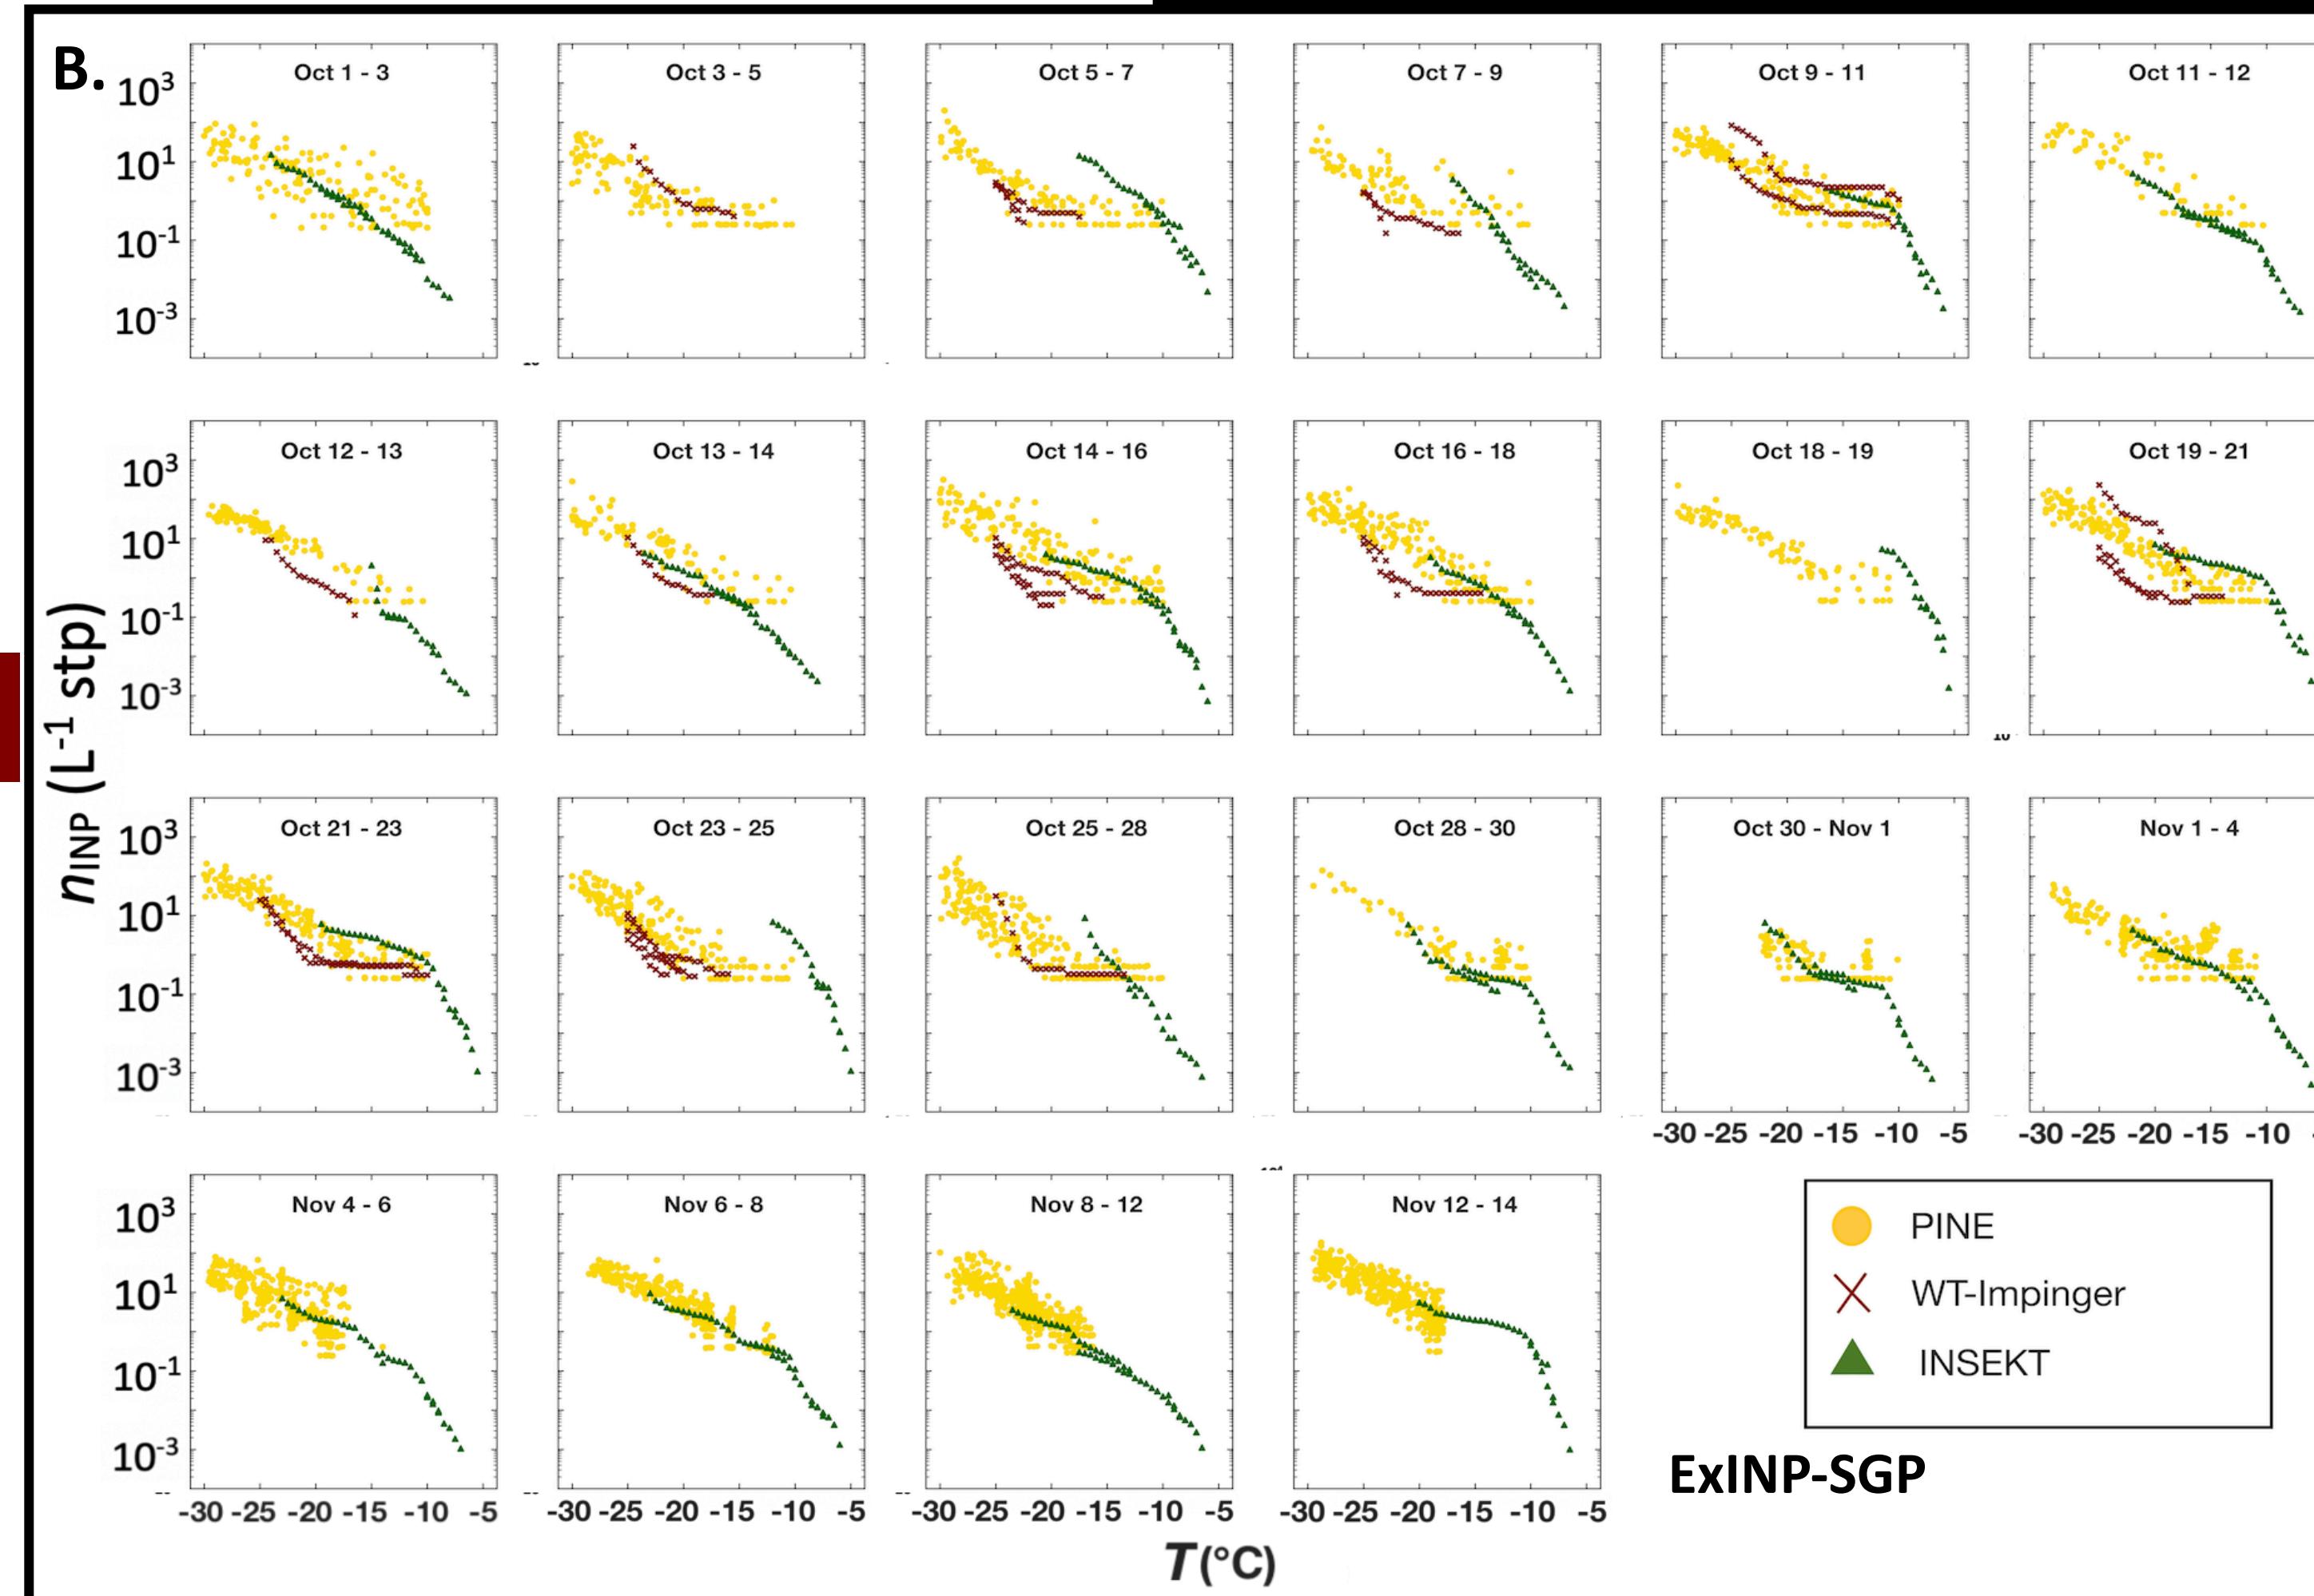

## SGP INP Parameterizations

- ❖ We have successfully developed INP parameterizations, such as ice nucleation active surface site density ( $n_s(T)$ )<sup>[8]</sup> for 45 consecutive days based on our PINE INP data (Fig. 4a).
- ❖ Compared to  $n_{INP}$ , the surface area based parameterization may minimize the spread of uncertainty in  $n_s$  at a given  $T$ .

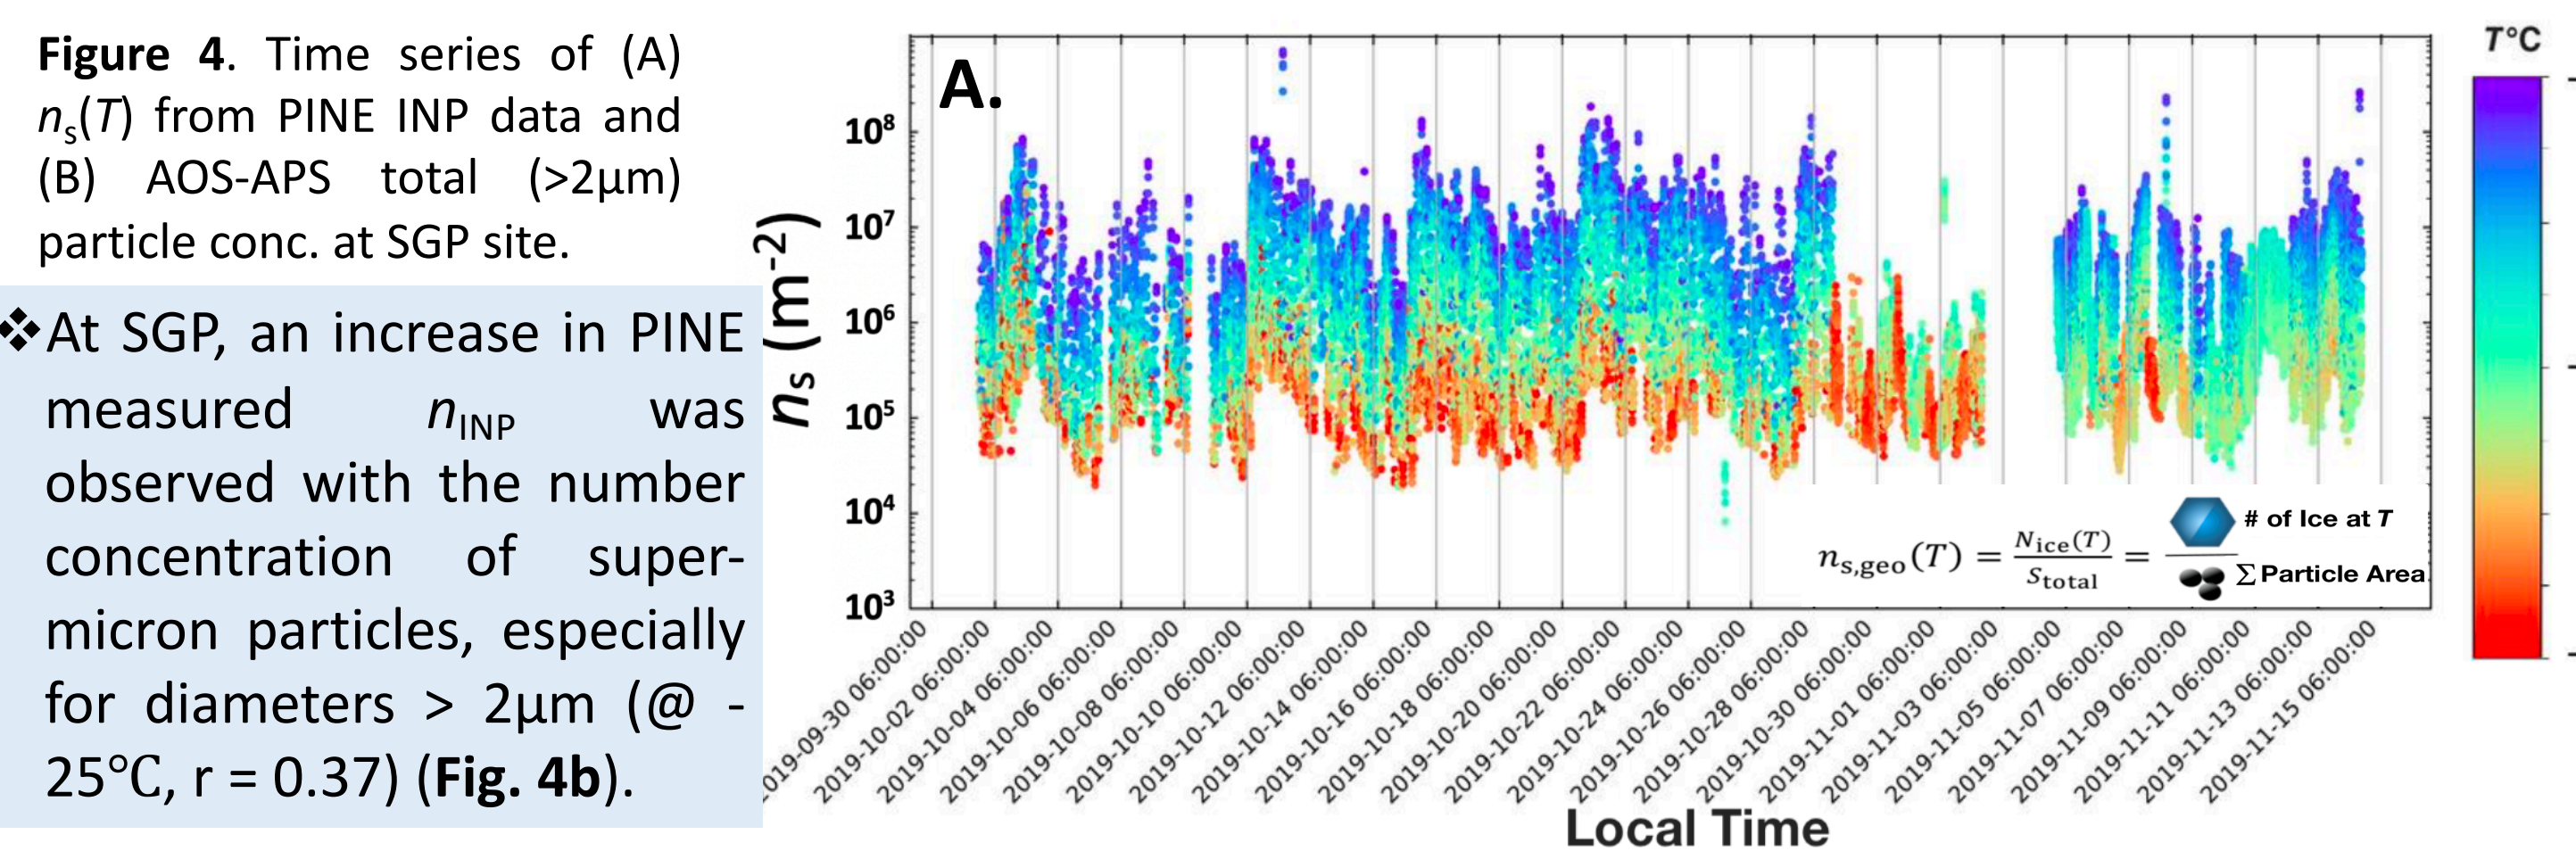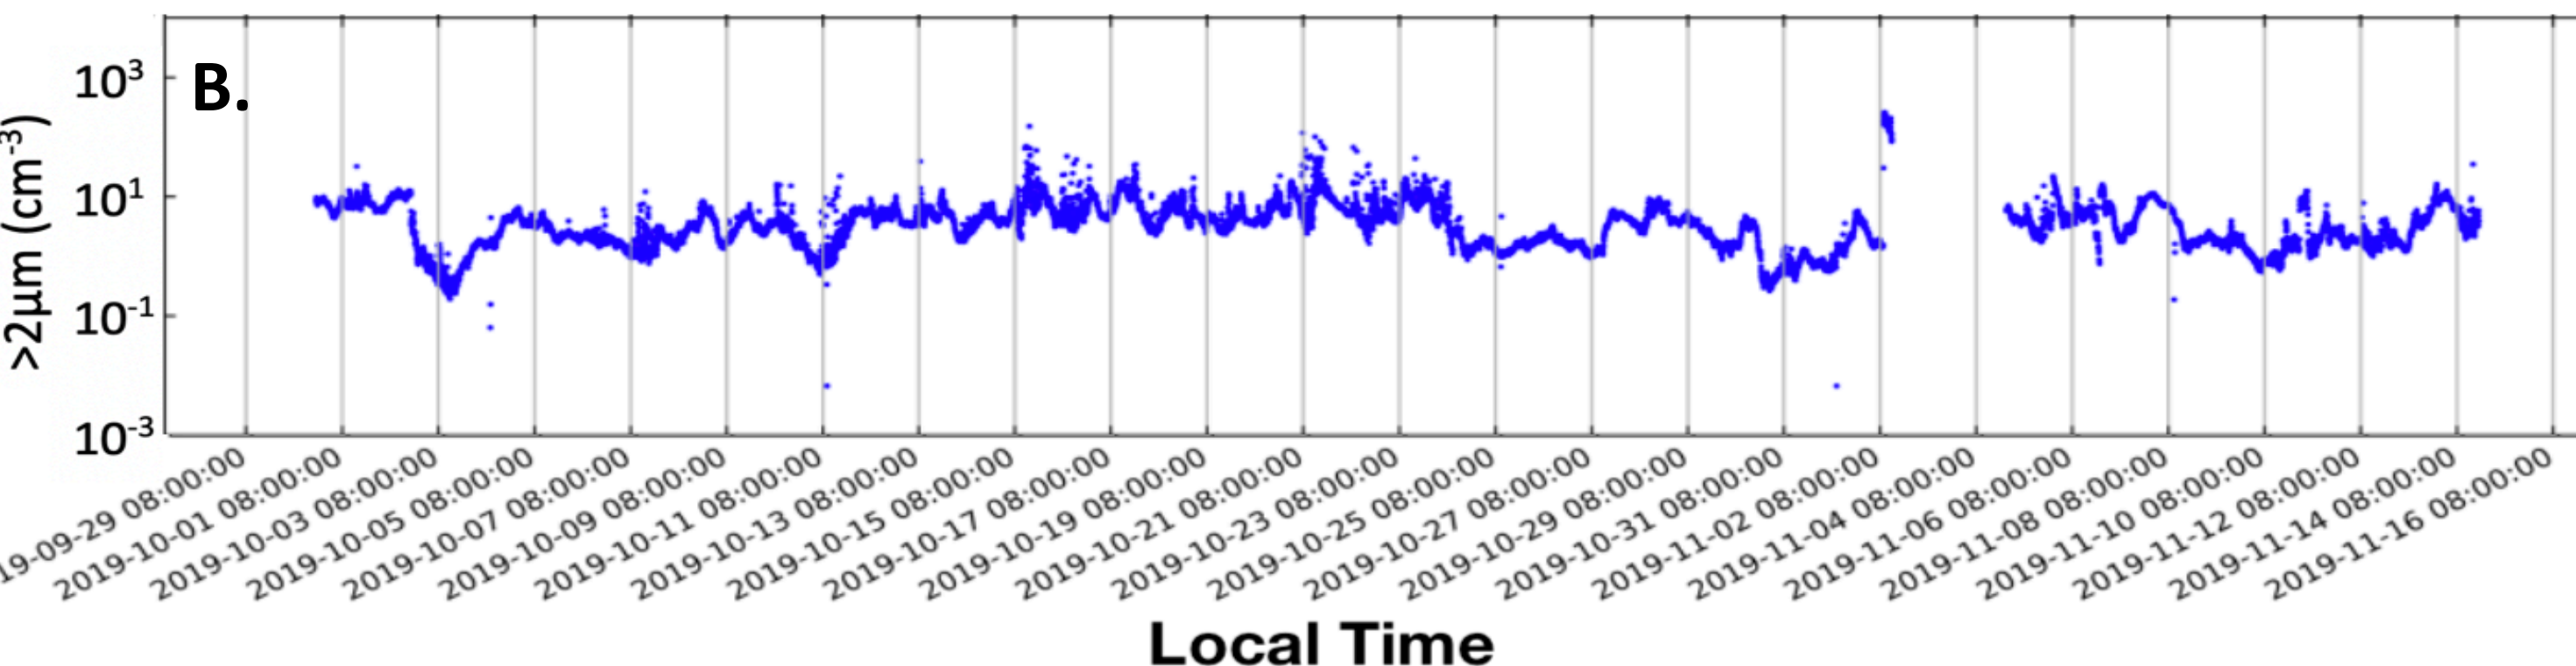

Figure 4. Time series of (A)  $n_s(T)$  from PINE INP data and (B) AOS-APS total (>2µm) particle conc. at SGP site.

- ❖ At SGP, an increase in PINE measured  $n_{INP}$  was observed with the number concentration of supermicron particles, especially for diameters  $> 2\mu\text{m}$  (@  $-25^\circ\text{C}$ ,  $r = 0.37$ ) (Fig. 4b).

## Supermicron Particles - INP Abundance at SGP

- ❖ Relatively high daily averaged  $n_{INP}$  @  $-25^\circ\text{C}$  ( $35.6 \pm 8.4 \text{ L}^{-1}$ ) was coincided with the supermicron particle laden condition observed on 10/21 (Fig. 5).
- ❖ The low  $n_{INP}$  @  $-25^\circ\text{C}$  on 10/25 ( $4.7 \pm 1.2 \text{ L}^{-1}$ ) may be due to decrease in total concentration of supermicron particles.

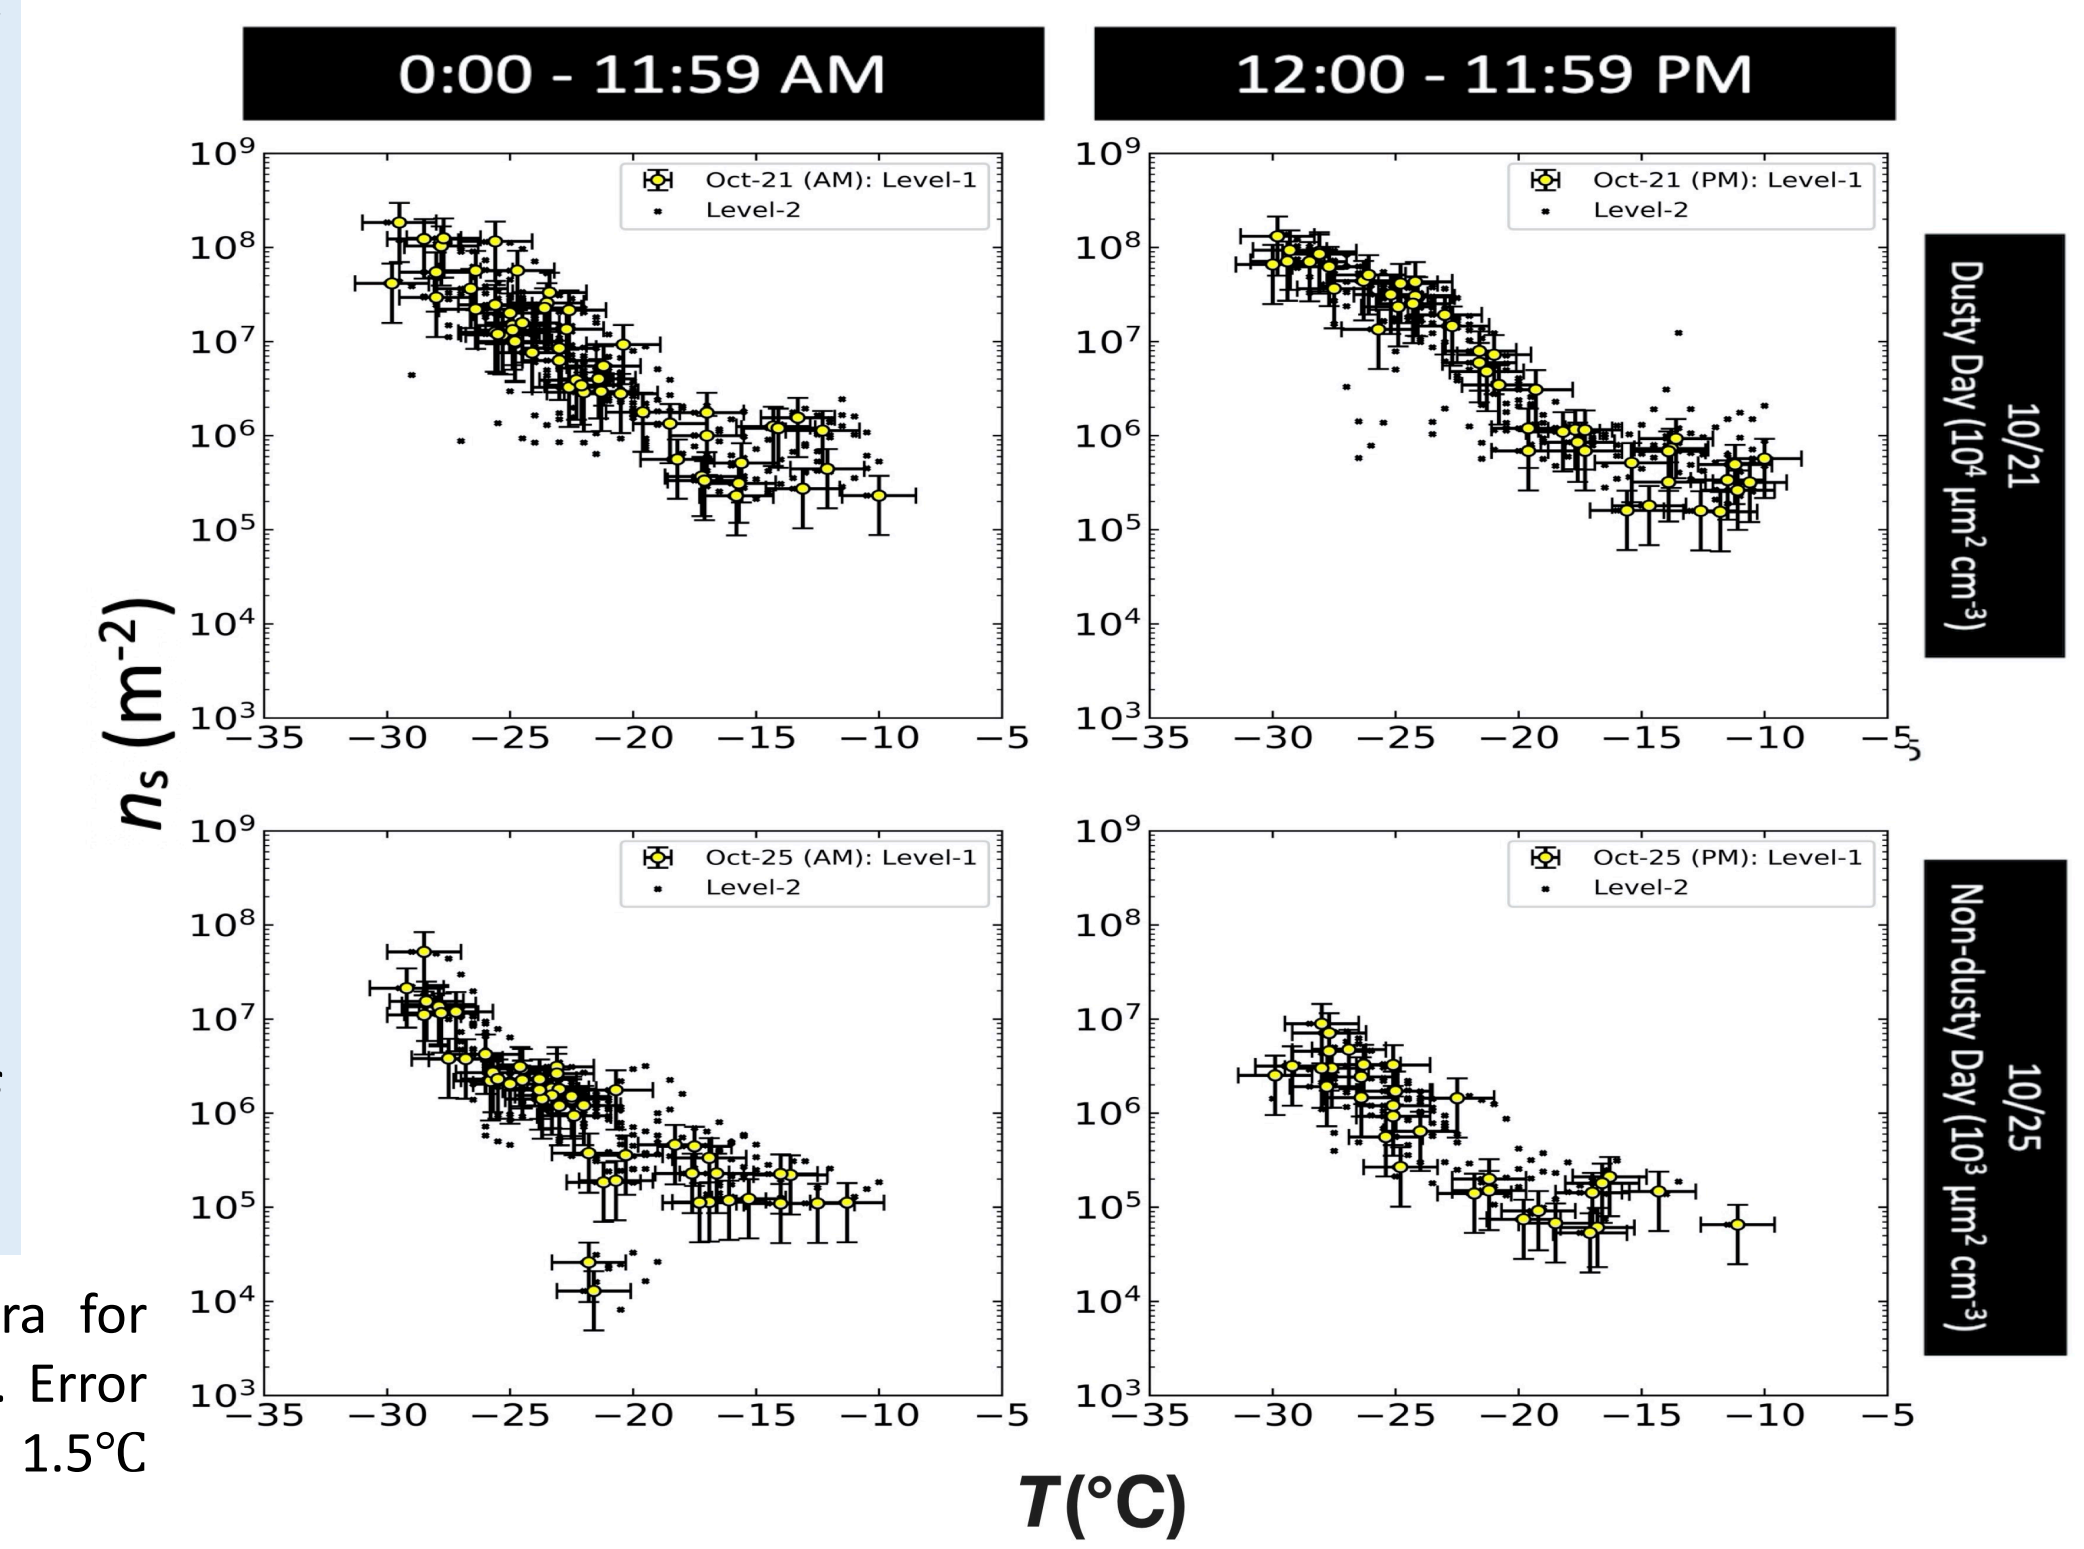

Figure 5.  $n_s(T)$  based IN spectra for 10/21 & 10/25 days at SGP site. Error bars are systematic errors of  $\pm 1.5^\circ\text{C}$  (X-axis) &  $\pm 62\%$  (Y-axis).

## Immersion Freezing Predominance at SGP ?

- ❖ Our preliminary results suggested that the immersion freezing was the dominant ice-nucleation mechanism at the SGP site compared to the deposition mode. (Fig. 6).
- ❖ We observed no substantial correlation between cloud condensation nuclei (CCN) at  $SS = 0.2\%$  and  $n_{INP}$  ( $-20^\circ\text{C}$ ) during our campaign period ( $r = 0.002$ ).

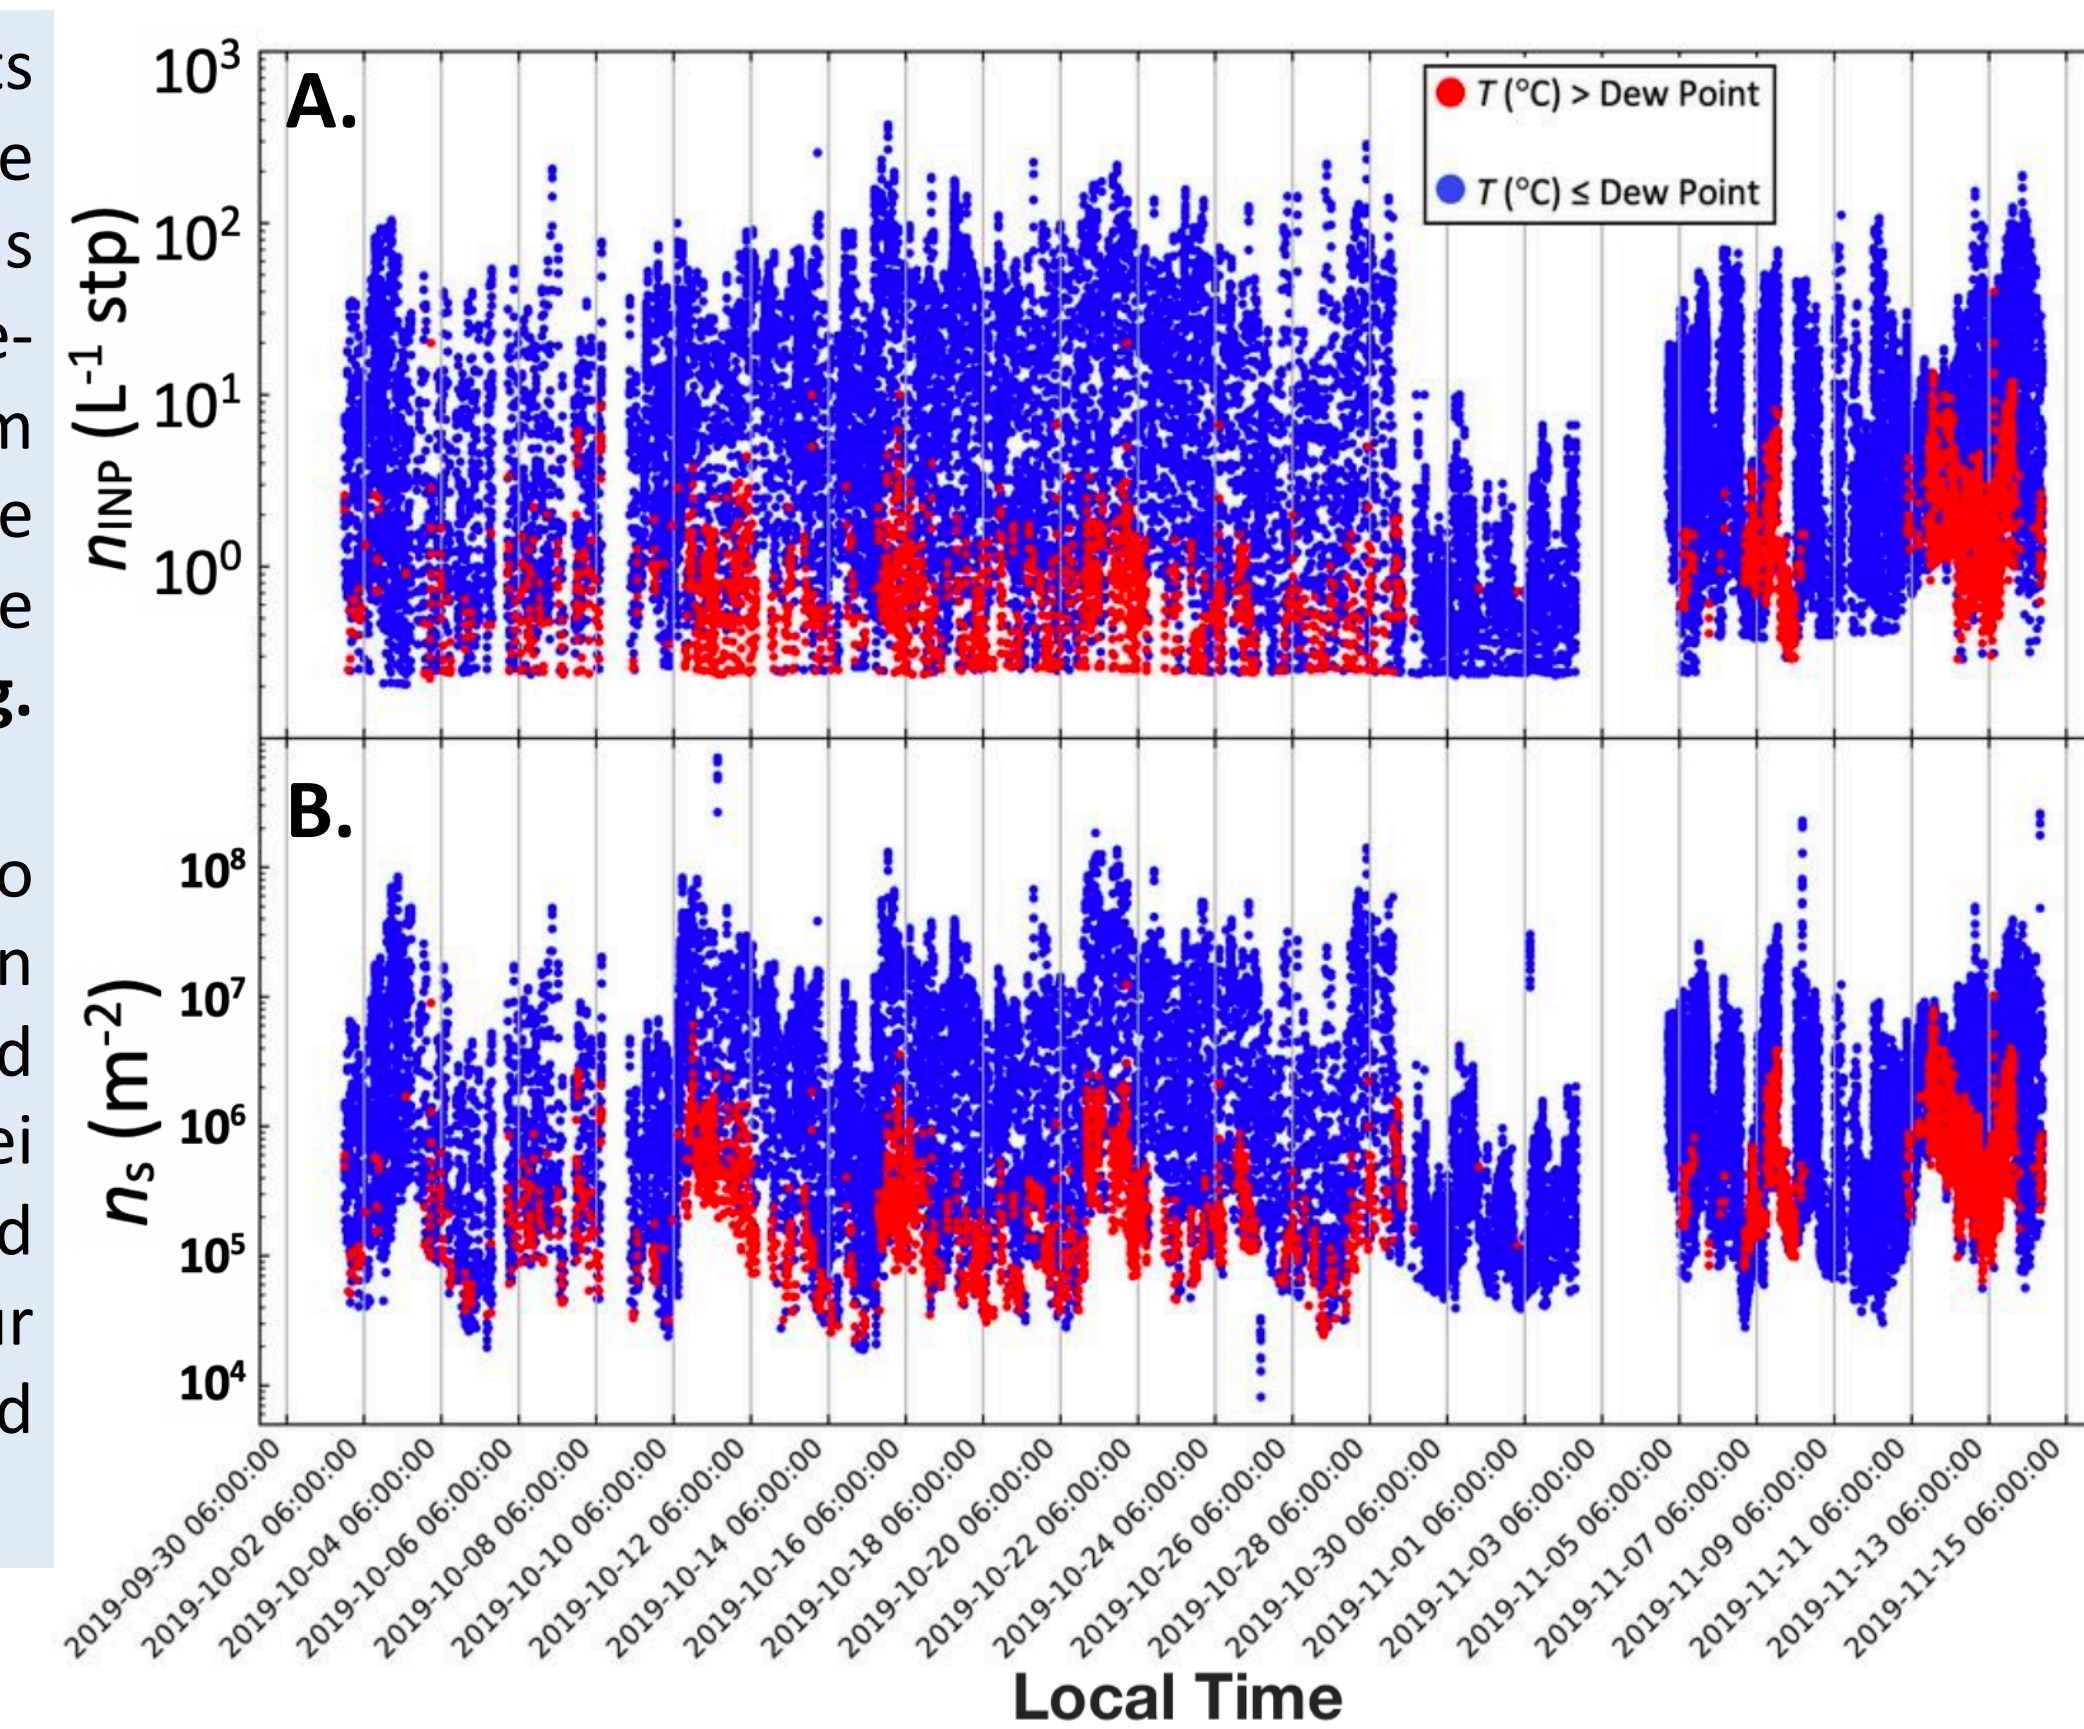

Figure 6. Time series of (A)  $n_{INP}$  and (B)  $n_s(T)$  separated based on dew point temperature.

## Summary & Outlook

- ❖ Unattended remote operation of PINE at SGP was successful, and we have processed 45 days of PINE data for Level-0  $\rightarrow$  Level-1  $\rightarrow$  Level-2.
- ❖ PINE is susceptible to the high  $T$  INP detection for  $INP > 0.2 \text{ L}^{-1}$  with ~8 min time resolution.
- ❖ We observed that aerosol particle surface area is not a sole factor determining ice nucleation efficiency at SGP in 2019. Other factors like aerosol particle composition, mixing-state etc. should also be examined in the future.
- ❖ Comparison of PINE and the offline INP measurements highlighted the important factors to be considered, like collection efficiency & transmission losses of supermicron INPs in PINE & other sampling techniques.
- ❖ We need to look into the relationship between INP propensity and ambient conditions, atmospheric dynamics, & thermodynamics, connecting the aerosols at ground level to higher altitudes.
- ❖ Contributions of deposition nucleation (INP measured at  $T$  above Dew Point and/or at  $< -30^\circ\text{C}$  at SGP) will be further investigated along with the estimation of mole fraction of water in aerosol particles to finalize our immersion INP data.
- ❖ A water activity based ice nucleation kinetics parameterization<sup>[5]</sup> will be developed using SGP PINE data.
- ❖ The Poisson mean based 95% confidence intervals<sup>[6]</sup> for PINE measured INP data will be developed as Level-3 PINE data.
